# Supplementary material for: The Nothapodytes nimmoniana genome provides insights into the independent evolution of camptothecin biosynthesis in asterids
Source: Research Square preprint supplement (doi:10.21203/rs.3.rs-5971869/v1), 2025-02-11
Supplement: Supplementary file 1 [file a49507d8aff3b054831cdb89.xlsx]

## Sheet: Table S1
Supplementary Table 1. Sequencing data and mapping rates.
	DNA			RNA
	Illumina	PacBio	Hi-C	Illumina
				Root	Stem	Leaf	Petiole	Flower bud	Flower	Fruit	Fruit stalk
Read (#)	511674930	10296860	1296928192	64961597	64229772	64840733	65932745	66447182	62664775	63216225	63193496
Base (#)	153502479000	171685171253	509078457600	19488479100	19268931600	19452219900	19779823500	19934154600	18799432500	18964867500	18958048800
Depth (×)	30	34	100	/	/	/	/	/	/	/	/
Mapping rate	0.99505		0.715125	0.982433	0.9666	0.982733	0.9674	0.966267	0.9693	0.9804	0.981467

## Sheet: Table S2
Supplemental Table 2. Statistics of assembled contigs.
	HiFi contigs
Total sequence#	732
Total size (Mb)	5075.69
Max length (Mb)	288.326
Min length (Mb)	14.365
Average Length (Mb)	6.934
N50 length (Mb)	159.634
N90_length (Mb)	66.006
GC content (%)	31.14

## Sheet: Table S3
Supplemental Table 3. BUSCO assessment of assemblies and predicted gene sets.
		Genome assembly	Percent	Predicted gene sets	Percent
Complete		2030	0.957	2050	0.967
	Single	695	0.328	772	0.364
	Duplicate	1335	0.629	1278	0.603
Fragment		14	0.007	47	0.022
Missing		77	0.036	24	0.011
Total BUSCOs		2121	/	2121	/
* BUSCO version is 3.0.2, lineage dataset is embryophyta_odb10

## Sheet: Table S4
Supplemental Table 4. Transposable elements in the N. nimmoniana genome assembly.
Type	#elements	length (bp)	%genome
Retroelements	2351628	2727429462	53.73
SINEs:	12	8481	0
Penelope	107	78086	0
LINEs:	13566	14070702	0.28
CRE/SLACS	0	0	0
L2/CR1/Rex	78	81538	0
R1/LOA/Jockey	0	0	0
R2/R4/NeSL	0	0	0
RTE/Bov-B	9002	8352109	0.16
L1/CIN4	4360	5547908	0.11
LTR elements:	2338050	2713350279	53.46
BEL/Pao	0	0	0
Ty1/Copia	663321	858788513	16.92
Gypsy/DIRS1	1342843	1496905580	29.49
Retroviral	277	587396	0.01
DNA transposons	7567	24112780	0.48
hobo-Activator	4932	8878792	0.17
Tc1-IS630-Pogo	0	0	0
En-Spm	0	0	0
MuDR-IS905	863	8013568	0.16
PiggyBac	0	0	0
Tourist/Harbinger	23	40294	0
Other	19	35510	0
Rolling-circles	8	10591	0
Unclassified:	95692	129532364	2.55
Total interspersed repeats:		2881074606	56.76

## Sheet: Table S5
Supplemental Table 5. Gene functional annotation statistics.
Database	Number	Percent(%)
Swissprot	70388	75.21
NR	86115	92.01
KEGG	68426	73.11
UniProt	86016	91.9
GO	50213	53.65
Pfam	62809	67.11
Annotated	88588	94.65
Unannotated	5005	5.35
Total	93590	/

## Sheet: Table S6
Supplementary Table 6. Composition comparisons between intersubgenome homoeologous chromosomes.
Subgenome name	Chromosome name	Length(bp)	Number of genes	Gene (bp)	Percentage of whole subgenome	repeat (bp)	Percentage of whole subgenome
A01	Chr1	285867357	5739	25578161	0.955474	268568610	10.0301
A02	Chr3	225173175	3968	18488000	0.690614	211777226	7.90918
A03	Chr4	222021921	3614	14861736	0.555171	220716253	8.24302
A04	Chr5	217800217	3513	15251204	0.569713	215258783	8.0392
A05	Chr7	205048568	4040	16306612	0.609149	193427363	7.22387
A06	Chr10	193185241	4229	18559150	0.69328	179251835	6.69446
A07	Chr12	183653306	2912	12672817	0.473396	184972142	6.90809
A08	Chr13	174818150	2899	12295401	0.459301	171702381	6.41251
A09	Chr14	171348898	2416	10379549	0.387732	171264206	6.39615
A10	Chr15	167708004	2889	13039580	0.487093	159657018	5.96266
A11	Chr18	161434921	3128	13327552	0.497857	152749100	5.70467
A12	Chr19	160246129	2276	10363021	0.387109	159222681	5.94644
A13	Chr20	157133710	2175	9969978	0.372427	163783301	6.11676
A14	Chr21	152174959	2328	10442835	0.390092	155573190	5.81014
Total subgenome A	\	2677614556	46126	201535596	7.52841	2607924089	97.3973
B01	Chr2	257977803	6016	26628315	1.13642	224741166	9.58916
B02	Chr6	205098099	2924	13027629	0.555982	195676091	8.34902
B03	Chr8	195112765	3381	14740899	0.629102	183444779	7.82714
B04	Chr9	194673802	4114	19394628	0.827697	172699764	7.36868
B05	Chr11	189517895	3995	16819826	0.717831	169560139	7.23472
B06	Chr16	165866177	4035	19029542	0.812116	143389904	6.1181
B07	Chr17	162437794	2833	12538930	0.535126	149737773	6.38894
B08	Chr22	147564974	2660	12517340	0.534198	135388321	5.77669
B09	Chr26	137753067	2381	10605176	0.452599	127566133	5.44293
B10	Chr23	145808689	2799	12828577	0.547483	130778760	5.58001
B11	Chr25	140250183	3082	13872574	0.59204	122745527	5.23725
B12	Chr24	140888398	2228	10238320	0.436939	131851433	5.62578
B13	Chr27	132014471	2259	9895220	0.422301	123148679	5.25445
B14	Chr28	128737087	2170	10080899	0.43022	118239100	5.04497
Total subgenome B	\	2343701204	44877	202217875	8.63006	2128967569	90.8378

## Sheet: Table S7
Supplementary Table 7. Composition of transposable elements between subgenomes.
		Subgenome A		Subgenome B
		Number	Sze(bp)	Number	Size(bp)
LTR retrotransposons	LTR/BEL	80	92829	94	145009
	Ty1/Copia	511154	577682280	308481	339529694
	LTR/Gypsy	1059608	1038281061	592967	555170968
	LTR/Caulimovirus	8954	14449578	5378	8446402
	LTR/ERV2	45	42163	16	13034
	LTR/ERV1	80	190575	26	12600
	LTR/ERV3	1	71	2	597
	LTR	92031	116989595	50460	63393068
	LTR/LTR	148993	130009558	96572	69356800
	LTR/DIRS	15	9722	0	0
	total	1820961	1877747432	1053996	1036068172
Non-LTR retrotransposons	SINEs	10	7915	0	0
	LINE/Penelope	74	59235	81	90608
	LINE/LINE	15	10451	0	0
	LINE/CR1	22	10791	19	76143
	LINE/L1	1956	3020157	2865	3478523
	LINE/L2	21	16630	37	17386
	LINE/Daphne	59	19747	10	8916
	LINE/Nimb	1	799	0	0
	LINE/RTE	135	108039	151	69389
	LINE/RTE-BovB	5696	7288509	4579	5396082
	LINE/Kiri	0	0	1	64
	total	7989	10542273	7743	9137111
DNA transposons	DNA/Dada	3	441	0	0
	DNA/Mariner/Tc1	692	270266	132	146711
	DNA/Crypton	12	1618	0	0
	DNA/MuDR	478	2165122	177	125230
	DNA/piggyBac	30	28110	174	140785
	DNA/hAT-Tip100	80	195780	23	25913
	DNA/IS3EU	5	5663	0	0
	DNA/Merlin	2	274	0	0
	DNA/TcMar	4	387	0	0
	DNA/DNA	49	29967	31	24929
	DNA/P	104	29671	0	0
	DNA/CMC-EnSpm	73	173680	48	68475
	DNA/MULE-MuDR	124	166069	79	91645
	DNA/Ginger1	108	43217	0	0
	DNA/EnSpm/CACTA	829	706211	231	186922
	DNA/Polinton	1	72	0	0
	DNA/Helitron	122	1398234	6	11568
	DNA/Zisupton	29	51370	6	10729
	DNA/CMC-Transib	2	273	0	0
	DNA	77	25256	43	17086
	DNA/hAT	452	797321	281	296319
	DNA/Sola	1	180	1	212
	DNA/PIF-Harbinger	6	9849	2	3853
	DNA/ISL2EU	2	274	2	1244
	DNA/hAT-Tag1	489	741642	387	598821
	DNA/hAT-Ac	2095	3212043	1389	2227091
	DNA/TcMar-Fot1	7	1199	0	0
	DNA/Transib	70	17158	16	31080
	DNA/Harbinger	18	7773	12	27145
	DNA/Kolobok	7	4427	2	2844
	total	5971	10083547	3042	4038602
Rolling-circles	RC/Helitron	6	8082	0	0
Unclassified	Unknown	60901	88107668	45498	56650443

## Sheet: Table S8
Supplementary Table 8. Variations between homoeologous chromosome pairs.
	SNP	Indel	Inversions	Translocations	Duplications
ChrA01/ChrB01	1400184	164755	87	1738	2205
ChrA02/ChrB02	1002258	116959	59	1232	1582
ChrA03/ChrB03	699412	75310	35	1108	1963
ChrA04/ChrB04	844548	92217	53	1348	1840
ChrA05/ChrB05	928459	104792	59	1413	1583
ChrA06/ChrB06	948004	111637	38	1083	1463
ChrA07/ChrB07	744705	80679	44	1222	1499
ChrA08/ChrB08	573136	70224	37	509	1340
ChrA09/ChrB09	545135	61645	24	735	1330
ChrA10/ChrB10	693975	80380	47	886	1215
ChrA11/ChrB11	720549	83802	31	824	1100
ChrA12/ChrB12	555419	64259	31	742	1329
ChrA13/ChrB13	515103	60529	18	554	1154
ChrA14/ChrB14	550717	60502	37	780	1110
Total	10721604	1227690	600	14174	20713

## Sheet: Table S9
Supplementary Table 9. Homoeologous gene expression divergence between the two subgenomes.
Tissus	log2(A/B(FPKM))
	1	-1	2	-2	3	-3	4	-4	5	-5
Root	6648	7181	3276	3544	1637	1789	848	928	430	487
Fruit Stalk	6162	6826	3039	3467	1436	1711	705	827	335	379
Fruit	6815	7066	3481	3661	1832	1959	962	1012	523	524
Flower bud	6496	6984	3238	3621	1607	1819	756	857	376	417
Flower	6931	7343	3620	3985	1908	2135	1001	1160	540	632
Stem	6566	7094	3307	3710	1744	1968	927	1066	498	545
Petiole	6470	7141	3284	3659	1710	1954	941	1025	509	545
Leaf	6498	7070	3451	3811	1832	2047	986	1096	527	621
Eight tissues	13891	14511	8629	9107	5340	5691	3243	3472	1923	2103
	0.581725	0.607689	0.531866	0.561329	0.504821	0.538003	0.492035	0.526779	0.481472	0.52654
One way	9368	9988	7117	7595	4887	5238	3119	3348	1891	2071
	0.392311	0.418275	0.438671	0.468134	0.461997	0.495179	0.473221	0.507965	0.47346	0.518528
Swing	4523		1512		453		124		32
	0.189413		0.0931953		0.0428247		0.0188135		0.00801202
Overall	23879		16224		10578		6591		3994	-
	0.808115		0.549054		0.357982		0.223053		0.135165
29549 homoeologous gene pairs were identified

## Sheet: Table S10
Supplementary Table 10. Candidate genes involved in the biosynthesis of CPT in N. nimmoniana.
Description	Abbreviation	Query_GenBank	species	Target_gene ID	Identity (%)	query_match_range	target_match_range	pct_query_len	pct_target_len	Evalue	Dupilcation type	Homoeologous pair
Geraniol synthase	NnGES1	ALL56347.1	C. acuminata	Nni_ChrB01G16250.1	65.69	54-593	46-587	90.91	92.02	0	Singleton	\
Geraniol synthase	NnGES2	ALL56347.1	C. acuminata	Nni_ChrA03G15860.1	67.91	91-592	2-505	84.51	99.21	0	Singleton	\
10-hydroxygeraniol oxidoreductase	Nn10GHO1	AAQ20892.1	C. acuminata	Nni_ChrA02G16020.1	76.11	1-360	1-360	100	99.17	0	Singleton	\
10-hydroxygeraniol oxidoreductase	Nn10GHO2	AAQ20892.1	C. acuminata	Nni_ChrB02G18240.1	76.11	1-360	1-360	100	99.17	0	Singleton	\
10-hydroxygeraniol oxidoreductase	Nn10GHO3	AAQ20892.1	C. acuminata	Nni_ChrA13G10880.1	76.6	1-359	1-359	99.72	99.72	0	WGD or segmental	\
10-hydroxygeraniol oxidoreductase	Nn10GHO4	AAQ20892.1	C. acuminata	Nni_ChrB13G03080.1	77.16	1-359	1-359	99.72	99.72	0	WGD or segmental	\
10-hydroxygeraniol oxidoreductase	Nn10GHO5	AAQ20892.1	C. acuminata	Nni_ChrA13G10910.1	76.88	1-359	1-359	99.72	99.72	0	Tandem	\
iridodial synthase	NnIS1	AON76722.1	C. acuminata	Nni_ChrA09G14830.1	67.44	1-389	7-391	100	98.47	0	WGD or segmental	NnIS1_NnIS3
iridodial synthase	NnIS2	AON76722.1	C. acuminata	Nni_ChrA09G21650.1	65.5	1-389	7-401	100	98.5	0	Proximal	\
iridodial synthase	NnIS3	AON76722.1	C. acuminata	Nni_ChrB09G16080.1	66.84	13-389	10-381	96.92	97.64	0	WGD or segmental	NnIS1_NnIS3
iridodial synthase	NnIS4	AON76722.1	C. acuminata	Nni_ChrB09G15610.1	61.74	11-389	8-355	97.43	98.03	5.13e-177	Tandem	\
iridodial synthase	NnIS5	AON76722.1	C. acuminata	Nni_ChrA06G21100.1	62.74	77-327	15-263	64.52	89.89	6.88e-115	WGD or segmental	NnIS5_NnIS6
iridodial synthase	NnIS6	AON76722.1	C. acuminata	Nni_ChrB06G34900.1	65.48	1-389	1-388	100	100	0	Dispersed	NnIS5_NnIS6
iridodial synthase	NnIS7	AON76722.1	C. acuminata	Nni_ChrA04G12160.1	62.53	1-389	1-391	100	100	0	Singleton	NnIS7_NnIS8
iridodial synthase	NnIS8	AON76722.1	C. acuminata	Nni_ChrB04G16780.1	62.02	1-389	1-391	100	100	0	Singleton	NnIS7_NnIS8
7-deoxyloganetic acid synthase	Nn7DLS1	AHX24370.1	C. roseus	Nni_ChrA05G09160.1	81.21	5-515	4-514	99.22	99.42	0	Singleton	Nn7DLS1_Nn7DLS2
7-deoxyloganetic acid synthase	Nn7DLS2	AHX24370.1	C. roseus	Nni_ChrB05G11290.1	81.15	28-515	18-505	94.76	96.63	0	WGD or segmental	Nn7DLS1_Nn7DLS2
7-deoxyloganetic acid glucosyltransferase	Nn7DLGT1	BAO01109.1	C. roseus	Nni_ChrA01G23990.1	54.32	8-480	9-474	98.13	97.49	0	Singleton	Nn7DLGT1_Nn7DLGT2
7-deoxyloganetic acid glucosyltransferase	Nn7DLGT2	BAO01109.1	C. roseus	Nni_ChrB01G50990.1	53.94	2-480	5-477	99.38	98.34	0	Singleton	Nn7DLGT1_Nn7DLGT2
7-deoxyloganetic acid glucosyltransferase	Nn7DLGT3	BAO01109.1	C. roseus	Nni_ChrA12G18860.1	55.74	4-482	2-452	99.38	98.69	0	Tandem	\
7-deoxyloganetic acid glucosyltransferase	Nn7DLGT4	BAO01109.1	C. roseus	Nni_ChrB12G03710.1	48.75	4-480	22-489	98.96	95.12	5.46e-172	Tandem	Nn7DLGT4_Nn7DLGT5
7-deoxyloganetic acid glucosyltransferase	Nn7DLGT5	BAO01109.1	C. roseus	Nni_ChrA12G06000.1	47.87	14-480	1-458	96.89	99.57	6.45e-164	WGD or segmental	Nn7DLGT4_Nn7DLGT5
7-deoxyloganetic acid glucosyltransferase	Nn7DLGT6	BAO01109.1	C. roseus	Nni_ChrB12G16330.1	46.55	9-479	6-471	97.72	98.11	3.54e-150	WGD or segmental	\
7-deoxyloganic acid 7-hydroxylase	NnDL7H1	AGX93062.1	C. roseus	Nni_ChrA05G40410.1	79.46	1-521	1-519	100	100	0	Singleton	NnDL7H1_NnDL7H2
7-deoxyloganic acid 7-hydroxylase	NnDL7H2	AGX93062.1	C. roseus	Nni_ChrB05G13120.1	78.89	1-521	1-519	100	100	0	WGD or segmental	NnDL7H1_NnDL7H2
camptothecin 10/11-hydroxylase	NnCPTH1	UUY85546.1	C. acuminata	Nni_ChrB04G13570.1	59.3	1-506	1-511	98.83	100	0	Singleton	\
camptothecin 10/11-hydroxylase	NnCPTH2	UUY85546.1	C. acuminata	Nni_ChrA06G39300.1	49.02	1-505	1-486	98.63	99.79	1.93e-175	WGD or segmental	\
camptothecin 9-hydroxylase	NnCPTH3	WMS56964.1	Nothapodytes tomentosa	Nni_ChrA06G03400.1	98.65	1-520	1-520	100	100	0	WGD or segmental	NnCPTH3_NnCPTH4
camptothecin 9-hydroxylase	NnCPTH4	WMS56964.1	Nothapodytes tomentosa	Nni_ChrB06G18650.1	97.89	1-520	1-520	100	100	0	WGD or segmental	NnCPTH3_NnCPTH4
9-hydroxycamptothecin O-methyltransferase 2	NnOMT1	WMS56966.1	Nothapodytes tomentosa	Nni_ChrA07G06970.1	97.3	1-296	1-296	83.15	95.18	0	Dispersed	NnOMT1_NnOMT2
9-hydroxycamptothecin O-methyltransferase 2	NnOMT2	WMS56966.1	Nothapodytes tomentosa	Nni_ChrB07G05240.1	95.51	1-356	1-356	100	100	0	WGD or segmental	NnOMT1_NnOMT2
9-hydroxycamptothecin O-methyltransferase 2	NnOMT3	WMS56966.1	Nothapodytes tomentosa	Nni_ChrB07G22280.1	95.22	1-356	1-356	100	100	0	WGD or segmental	\
9-hydroxycamptothecin O-methyltransferase 2	NnOMT4	WMS56966.1	Nothapodytes tomentosa	Nni_ChrB07G07280.1	95.51	1-356	1-356	100	100	0	Dispersed	\
9-hydroxycamptothecin O-methyltransferase 1	NnOMT5	WMS56961.1	Nothapodytes tomentosa	Nni_ChrA05G09780.1	98.62	1-363	1-363	100	100	0	Singleton	NnOMT5_NnOMT6
9-hydroxycamptothecin O-methyltransferase 1	NnOMT6	WMS56961.1	Nothapodytes tomentosa	Nni_ChrB05G03830.1	93.17	6-363	1-366	98.62	100	0	Dispersed	NnOMT5_NnOMT6

[truncated: 3 more sheets: Table S11, Table S12, Table S13]
